# Supplementary material
Source: MDPI journal article supplement (https://www.mdpi.com/2073-4395/13/5/1352)

**Table S1.** BLUEs for saccharification efficiency, stover yield and grain yield.

| <b>Genotype</b>        | <b>SaccEff</b> | <b>Stover yield</b> | <b>Grain yield</b> |
|------------------------|----------------|---------------------|--------------------|
| 4550.INBRED            | 142.483488     | 22.3036777          | 25.6495778         |
| 4562INBRED             | 150.711633     | 20.07109            | 18.0197764         |
| 4578INBRED             | 156.796633     | 57.11509            | 72.5897764         |
| 52220                  | 152.561633     | 55.68709            | 94.9847764         |
| 58610A632(Meth)Bc5S4   | 159.106633     | 59.80309            | 61.0997764         |
| 58613B73(Meth)Bc5S4    | 158.886633     | 92.64709            | 24.6197764         |
| 58801InbredMo17        | 169.016633     | 69.37909            | 78.8347764         |
| 676A-348-68(B)         | 153.656633     | 45.35509            | 37.8047764         |
| 764                    | 143.751633     | 55.85509            | 62.8047764         |
| 78371A                 | 157.071633     | 87.35509            | 142.979776         |
| 789                    | 151.431633     | 39.13909            | 52.2047764         |
| 89S4110                | 171.374892     | 124.251838          | 96.5710856         |
| 89S4125                | 140.849892     | 86.6198378          | 93.4010856         |
| 89S4154                | 140.209892     | 109.467838          | 85.0210856         |
| 90                     | 160.981633     | 47.45509            | 50.6147764         |
| 991                    | 159.678488     | 50.7796777          | 80.3995778         |
| A165                   | 154.769892     | 27.3158378          | 44.7010856         |
| A295                   | 157.639892     | 42.7718378          | 41.7810856         |
| A310                   | 172.334892     | 40.1678378          | 55.9760856         |
| A321                   | 153.009892     | 32.0198378          |                    |
| A407                   | 163.534892     | 37.3958378          | 74.5110856         |
| A495                   | 155.709892     | 25.7198378          | 37.3510856         |
| A499                   | 146.044892     | 28.5758378          | 35.5310856         |
| A508                   | 166.404892     | 30.4238378          | 42.9060856         |
| A509                   | 169.054892     | 26.7278378          | 45.5210856         |
| A548                   | 159.404892     | 30.4238378          | 32.0260856         |
| A554                   | 182.399892     | 43.5278378          | 63.1210856         |
| A618                   | 146.634892     | 66.7118378          | 25.6560856         |
| A619                   | 159.969908     | 63.5626176          | 64.5157601         |
| A619HT                 | 163.375766     | 68.8134378          | 95.3648405         |
| A619Ht1                | 154.250766     | 57.8094378          | 62.4698405         |
| A619_g                 | 162.289892     | 55.1198378          | 65.2360856         |
| A624                   | 166.100766     | 75.7014378          | 81.4598405         |
| A628                   | 198.020766     | 77.3814378          | 80.8748405         |
| A631                   | 162.065766     | 33.2814378          | 53.7098405         |
| A632                   | 161.823223     | 96.7506751          | 104.089016         |
| A632.75A1A2C1R1-rB1P11 | 99.0507663     | 53.6094378          | 23.2248405         |
| A632_g                 | 149.445766     | 103.673438          | 96.7898405         |
| A637                   | 151.940766     | 22.5294378          | 16.7598405         |
| A645                   | 148.378687     | 81.8038731          |                    |
| A652                   | 168.930766     | 52.3494378          | 64.8948405         |
| A659                   | 148.165766     | 49.4094378          | 72.3648405         |
| A662_g                 | 170.715689     | 14.2905663          | 30.0453968         |
| A665                   | 159.939444     | 59.8536817          | 74.9807822         |
| A670                   | 157.258687     | 72.0598731          | 38.3939515         |
| A672                   | 151.443687     | 63.9118731          | 78.0589515         |

|                        |            |            |            |
|------------------------|------------|------------|------------|
| A677                   | 162.375766 | 46.4694378 | 55.4598405 |
| A7                     | 159.535766 | 41.1774378 | 47.3348405 |
| A71                    | 153.568687 | 84.7438731 | 74.8739515 |
| ABPI4                  | 159.030597 | 32.5347815 | 46.8700478 |
| AD11DS                 | 181.400597 | 74.9547815 | 41.7950478 |
| AD188L                 | 166.155597 | 41.8587815 | 45.4300478 |
| AD330                  | 160.723518 | 64.0052168 | 31.4391589 |
| AD363-1                | 188.425597 | 65.7147815 | 61.3950478 |
| ADSA3                  | 156.908518 | 63.9212168 | 50.3291589 |
| ADsg1501               | 163.363518 | 60.4772168 | 59.1091589 |
| ADsg1501-1             | 161.920597 | 67.5627815 | 58.1350478 |
| AR276                  | 167.678518 | 82.4852168 | 103.294159 |
| AusTRCF305819          | 163.648518 | 41.8292168 | 53.9941589 |
| AusTRCF305829          | 155.088518 | 67.1972168 | 82.2791589 |
| AusTRCF305831          | 163.573075 | 98.1242583 | 88.4923033 |
| AusTRCF305846          | 161.668075 | 76.7042583 | 76.8373033 |
| AusTRCF305849          | 161.233518 | 87.5252168 | 97.0241589 |
| AusTRCF306065          | 157.668518 | 109.533217 | 73.4741589 |
| AusTRCF306235          | 166.343075 | 91.9082583 | 69.2323033 |
| AusTRCF306238          | 172.448168 | 82.9040431 | 71.9176523 |
| AusTRCF306240          | 170.65861  | 67.0130016 | 53.4445078 |
| AusTRCF306294          | 149.72861  | 53.6570016 | 38.9195078 |
| AusTRCF306295          | 175.568168 | 60.4760431 | 71.4576523 |
| AusTRCF306296          | 160.563168 | 72.6560431 | 67.5826523 |
| AusTRCF306333          | 159.25861  | 68.6090016 | 64.9995078 |
| AusTRCF306348          | 158.03361  | 70.3730016 | 42.4045078 |
| B100                   | 155.028168 | 71.9000431 | 87.0326523 |
| B102                   | 151.52361  | 83.3930016 | 71.5745078 |
| B103                   | 158.36361  | 86.5010016 | 97.8445078 |
| B107                   | 165.92361  | 64.8290016 | 37.7995078 |
| B55                    | 159.34361  | 114.641002 | 113.509508 |
| B73HT                  | 147.862595 | 106.775912 | 85.7521838 |
| B75                    | 148.152153 | 60.6749537 | 40.0403283 |
| B93                    | 147.147595 | 45.3719122 | 64.4121838 |
| BR-28INBR.FR.YEL.PEARL | 161.002595 | 41.4239122 | 27.4721838 |
| Bei10=North10          | 146.182595 | 69.3119122 | 70.9221838 |
| C102                   | 158.792595 | 76.3679122 | 25.3771838 |
| C103                   | 166.947153 | 86.8829537 | 95.2653283 |
| C123                   | 152.487153 | 83.6069537 | 91.0753283 |
| C14                    | 147.862595 | 36.8039122 | 43.9371838 |
| C27                    | 149.792153 | 40.8509537 | 18.1403283 |
| C8pseudo               | 155.487595 | 25.7159122 |            |
| CH753-4                | 161.582153 | 68.7389537 | 57.1953283 |
| CH9                    | 159.952595 | 81.4919122 | 40.7771838 |
| CHAN11INBRED           | 156.937595 | 90.2279122 | 106.667184 |
| CHI-69INB.             | 152.122153 | 39.4229537 | 18.8403283 |
| CI40A                  | 159.492595 | 53.9399122 | 34.3521838 |
| CI92                   | 134.264004 | 74.1963746 | 54.3772879 |
| CMV3                   | 164.439004 | 14.1363746 |            |

|                   |            |            |            |
|-------------------|------------|------------|------------|
| CO109             | 152.629447 | 57.549333  | 27.1141434 |
| CO150             | 145.914004 | 42.1083746 | 74.7022879 |
| CO158             | 154.264004 | 48.1563746 | 64.4822879 |
| CO216             | 168.484004 | 82.1763746 | 65.3672879 |
| CO236             | 177.934004 | 31.7763746 | 40.3022879 |
| DAJINDING(JI0018) | 165.019447 | 118.281333 | 142.314143 |
| E8501             | 166.314447 | 115.173333 | 111.174143 |
| EP42              | 161.83085  | 64.1029511 | 46.3449817 |
| F39               | 173.494447 | 84.765333  | 44.7441434 |
| FR19              | 166.873217 | 67.1780106 | 65.3558402 |
| G80               | 148.980313 | 93.6846069 | 79.0603271 |
| GTS1              | 145.095313 | 74.2806069 | 30.5503271 |
| H106w             | 153.255313 | 88.0566069 | 51.9053271 |
| H111              | 149.759526 | 114.890243 | 70.7688795 |
| H123              | 152.345755 | 89.5535654 | 80.0071827 |
| H19               | 158.150755 | 69.5615654 | 32.2021827 |
| H27w              | 163.895313 | 72.3486069 |            |
| H29w              | 155.705313 | 70.5006069 | 34.7503271 |
| H41               |            | 48.8135654 | 21.6171827 |
| H42               | 173.640755 | 108.705565 | 86.8121827 |
| H49               | 156.325755 | 109.041565 | 45.8021827 |
| H5                | 170.080755 | 48.4775654 | 37.3421827 |
| H84               | 164.284526 | 84.2302429 | 110.92888  |
| H95               | 176.610755 | 78.3815654 | 46.1471827 |
| H98               | 161.334526 | 107.414243 | 39.2488795 |
| HY2               | 169.84889  | 84.9744164 | 67.8884257 |
| Hi33              | 139.650313 | 83.6886069 | 35.5103271 |
| Hi47              | 168.219526 | 83.8942429 | 103.17888  |
| IBB15             | 167.56389  | 59.7744164 | 71.3784257 |
| IBC2              | 160.71389  | 81.0264164 | 101.633426 |
| IP39              | 168.444677 | 27.6487804 |            |
| II101T            | 166.424677 | 49.7407804 | 37.5898734 |
| III.Hy            | 159.48012  | 91.1377389 | 68.576729  |
| J8606             | 160.00889  | 87.7464164 | 70.2734257 |
| K55               | 164.44512  | 69.6337389 | 44.046729  |
| L                 | 163.59389  | 118.826416 | 126.363426 |
| L127              | 153.33889  | 87.8304164 | 76.6034257 |
| L135              | 176.09889  | 106.310416 | 86.7634257 |
| LH61              | 175.414278 | 60.1510125 | 84.2501755 |
| LH85              | 185.830065 | 82.8773764 | 61.2866231 |
| MS1               | 183.500065 | 44.4053764 | 45.9216231 |
| MS100             | 167.775065 | 78.7613764 | 59.3966231 |
| MS106             | 152.935508 | 52.5383349 | 51.3234787 |
| MS1334            | 149.175065 | 26.9333764 | 13.2966231 |
| MS141             | 148.620065 | 60.2813764 | 50.3416231 |
| MS153             | 161.976745 | 67.5281419 | 95.8796045 |
| MS211             | 175.191745 | 62.4881419 | 29.1296045 |
| MS215             | 166.352188 | 38.7851004 | 50.3564601 |
| MS74              | 167.051745 | 34.6841419 | 29.4996045 |

|                    |            |            |            |
|--------------------|------------|------------|------------|
| Mo46               | 142.040065 | 86.4893764 | 59.2266231 |
| Mo48               | 142.825065 | 79.3493764 | 55.8916231 |
| N194               | 158.735959 | 76.805778  | 106.463157 |
| N505               | 144.021122 | 81.4512528 | 52.5321504 |
| N507               | 149.321122 | 111.859253 | 8.82715036 |
| N508               | 151.471122 | 71.7072528 | 31.5971504 |
| N509               | 151.321122 | 126.139253 | 74.6871504 |
| N510               | 165.341122 | 86.6592528 | 84.2621504 |
| N520               | 145.880959 | 127.625778 | 90.1681569 |
| N521               | 144.815959 | 103.265778 | 67.9431569 |
| N522               | 153.561122 | 108.499253 | 55.2821504 |
| N523               | 151.275959 | 148.373778 |            |
| N534               | 139.695959 | 116.705778 | 92.6131569 |
| N541               | 156.597528 | 122.09548  | 90.871108  |
| N543               | 153.592692 | 90.6209545 | 91.2851015 |
| N546               | 134.457528 | 64.7234797 | 74.576108  |
| NC282              | 163.392692 | 57.1049545 | 67.5901015 |
| NC288              | 168.697692 | 56.7689545 | 75.3551015 |
| NC306              | 152.353315 | 120.293844 | 56.0575556 |
| ND230              | 175.32389  | 24.7027638 | 49.7753781 |
| ND250              | 153.608315 | 25.3738436 | 49.7875556 |
| ND254              | 186.32889  | 23.8627638 | 35.7553781 |
| ND255              | 162.593315 | 38.7298436 | 68.6125556 |
| ND256              | 166.428315 | 28.9018436 | 38.5275556 |
| ND257              | 160.26889  | 27.0547638 | 49.0003781 |
| ND261              | 157.19389  | 27.8947638 | 31.4953781 |
| NO.380             | 154.99271  | 62.6100564 | 74.8027381 |
| NY121(NevahYaar)   | 149.171348 | 69.7867722 | 51.688468  |
| NY364(NevahYaar)   | 158.522135 | 95.7891362 | 103.649916 |
| OC10               | 144.21271  | 89.2380564 | 80.9077381 |
| OC19               | 141.781348 | 55.0027722 | 42.598468  |
| Oh33               | 149.296348 | 89.1067722 | 50.923468  |
| Oh40B              | 159.531348 | 55.7587722 | 76.503468  |
| Oh422              | 135.236348 | 62.4787722 | 16.718468  |
| Oh43E              | 149.29771  | 59.5020564 | 73.6227381 |
| Oh51A              | 158.11271  | 55.0500564 | 59.1177381 |
| P39Goodman-Buckler | 151.792281 | 26.9530614 | 22.4257679 |
| P39M96             | 157.327281 | 59.0410614 | 69.5857679 |
| P51                | 156.600919 | 47.4017772 | 31.2014977 |
| P51wx              | 162.257281 | 50.8090614 | 33.3257679 |
| PH207              | 153.626783 | 78.7543783 | 95.3775662 |
| PHJ75              | 153.917281 | 58.5370614 | 80.7657679 |
| PHK42              | 152.416083 | 67.419252  | 87.6004912 |
| PHN37              | 165.547281 | 41.1490614 | 50.3157679 |
| PHP02              | 153.591083 | 56.583252  | 83.7104912 |
| PHP55              | 152.256083 | 89.595252  | 105.780491 |
| Pa392              | 138.482281 | 78.1930614 | 72.3207679 |
| Pa759              | 138.896083 | 126.135252 | 87.1104912 |
| Pa91               | 158.011083 | 80.859252  | 97.1154912 |

|                        |            |            |            |
|------------------------|------------|------------|------------|
| Pa91HT3                | 146.826083 | 97.827252  | 76.7954912 |
| Q381                   | 154.731083 | 52.467252  | 48.7054912 |
| R-53-1INBR.FR.YELPEARL | 180.806698 | 61.8414549 | 57.824824  |
| R192                   | 152.481698 | 82.2534549 | 30.554824  |
| R216                   | 151.622896 | 41.5352643 | 65.1801006 |
| R219                   | 158.467896 | 75.9752643 | 85.1501006 |
| R74                    | 183.591698 | 109.637455 | 86.079824  |
| R851                   | 154.527896 | 60.5192643 |            |
| R853                   | 147.737896 | 26.4992643 | 19.9251006 |
| R906                   | 162.566698 | 47.9814549 | 63.949824  |
| R907                   | 151.056698 | 56.1294549 | 47.974824  |
| R914                   | 145.286698 | 42.7734549 | 49.229824  |
| S37                    | 158.022896 | 42.1232643 | 58.5901006 |
| S48                    | 153.117896 | 53.6312643 | 38.9601006 |
| S8                     | 175.502896 | 33.8072643 | 66.6001006 |
| S8324                  | 151.026698 | 87.8814549 | 101.939824 |
| SD15                   | 167.212896 | 61.2752643 | 69.5551006 |
| SD59                   | 163.38473  | 56.3438196 | 58.0959213 |
| SD69                   | 153.890928 | 54.349629  | 52.5611979 |
| STRAINT35-388-68(A)    | 164.555928 | 48.805629  | 49.6911979 |
| STRAINT36(101T)-394-68 | 180.04473  | 78.6878196 | 40.2309213 |
| SeagullSeventeen       | 173.33973  | 86.5838196 | 73.0959213 |
| T270                   | 144.330928 | 117.517629 | 124.516198 |
| T62S                   | 159.45473  | 89.5238196 | 27.8659213 |
| Va14A                  | 166.19973  | 98.9318196 | 79.3909213 |
| Va18A                  | 138.12973  | 86.2478196 | 70.3409213 |
| Va21A                  | 173.37473  | 78.1838196 | 91.8009213 |
| Va24                   | 164.245928 | 71.233629  | 69.5561979 |
| Va26                   | 142.67973  | 84.3158196 | 99.6409213 |
| Va35C                  | 170.57473  | 73.3118196 | 88.0409213 |
| Va36A                  | 149.41473  | 83.8958196 | 45.4809213 |
| Va52                   | 157.615701 | 51.56712   | 39.8969244 |
| Va59                   | 142.129503 | 74.4773106 | 54.9616477 |
| Va91                   | 144.840701 | 79.70712   | 77.4119244 |
| VaW6                   | 174.654503 | 52.4693106 | 44.8266477 |
| W117                   | 163.520701 | 42.49512   | 39.0219244 |
| W117HT                 | 167.495701 | 22.08312   | 37.6419244 |
| W22                    | 158.574503 | 75.9053106 | 97.9016477 |
| W401                   | 141.685701 | 57.78312   | 73.5219244 |
| W5543                  | 165.585701 | 50.47512   | 38.8619244 |
| W59E                   | 174.255701 | 22.75512   | 101.996924 |
| W8555                  | 164.329503 | 93.6293106 | 75.4616477 |
| WIL900                 | 152.454503 | 92.9573106 | 94.5816477 |
| WIL901                 | 158.945701 | 107.17512  | 100.556924 |
| WX38-11                | 163.024503 | 88.5893106 | 59.5816477 |
| WXI205                 | 155.864503 | 71.2853106 | 64.5566477 |
| WXW22                  | 156.489503 | 101.945311 | 52.3416477 |
| YANG                   | 169.740701 | 52.40712   | 46.5619244 |
| YE-CHI-HUNG            | 137.959503 | 142.517311 | 117.031648 |

|          |            |            |            |
|----------|------------|------------|------------|
| YING-55  | 161.080701 | 57.44712   | 78.0919244 |
| Yu796_NS | 164.574503 | 91.5293106 | 94.4816477 |
| ZS01250  | 158.040701 | 51.31512   | 49.5419244 |

**Figure S1.** Manhattan and Q-Q plot for grain and stover yield and saccharification efficiency.

Manhattan plot grain yield.

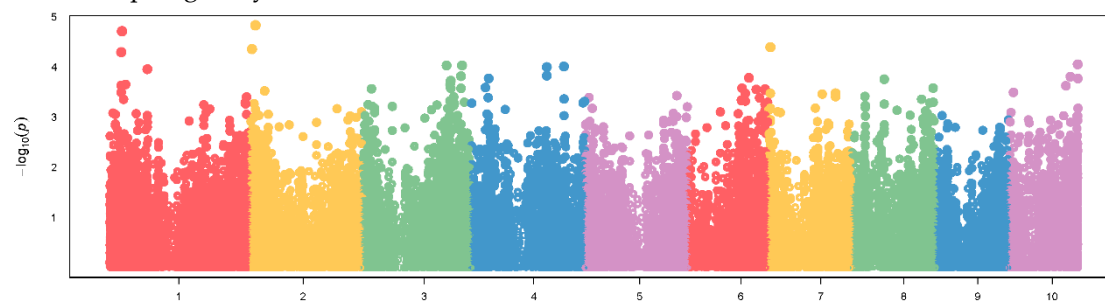

Manhattan plot stover yield

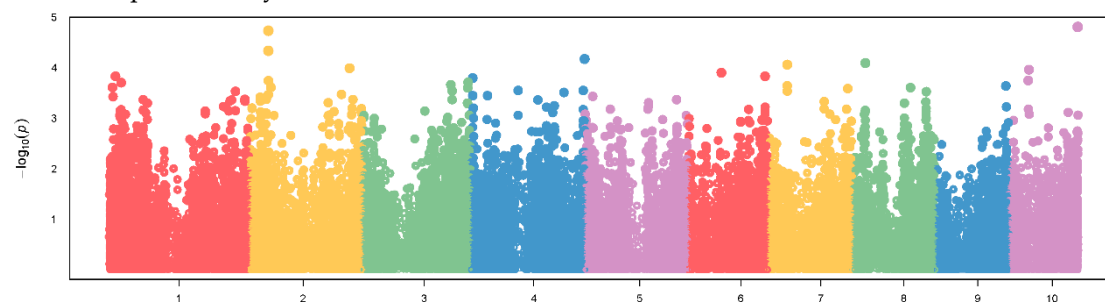

Manhattan plot saccharification efficiency

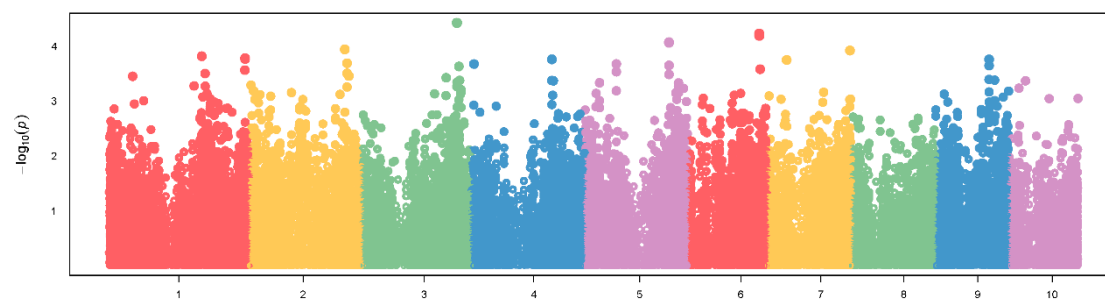

Q-Q plot grain yield

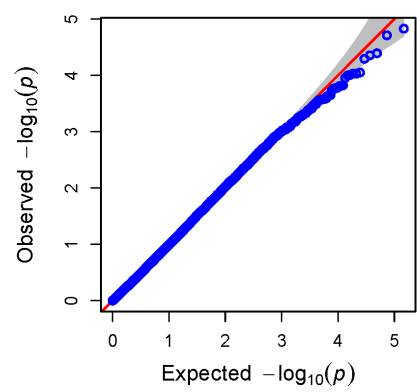

Q-Q plot stover yield

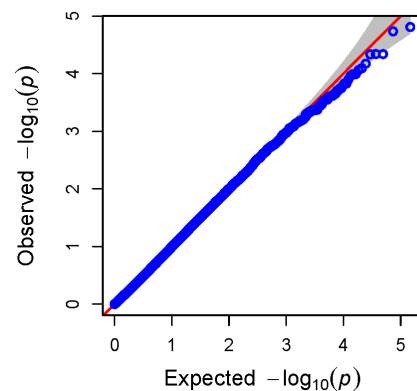

Q-Q plot saccharification efficiency

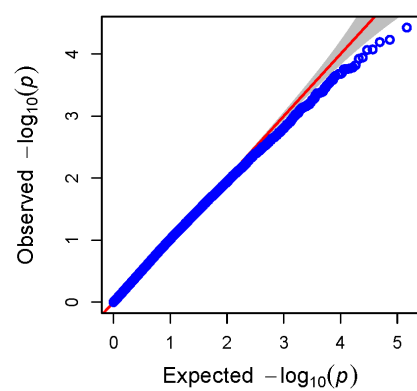

Supplement: s1 [file s1]
